# Supplementary material
Source: PubMed Central journal article supplement (PMC2077018)

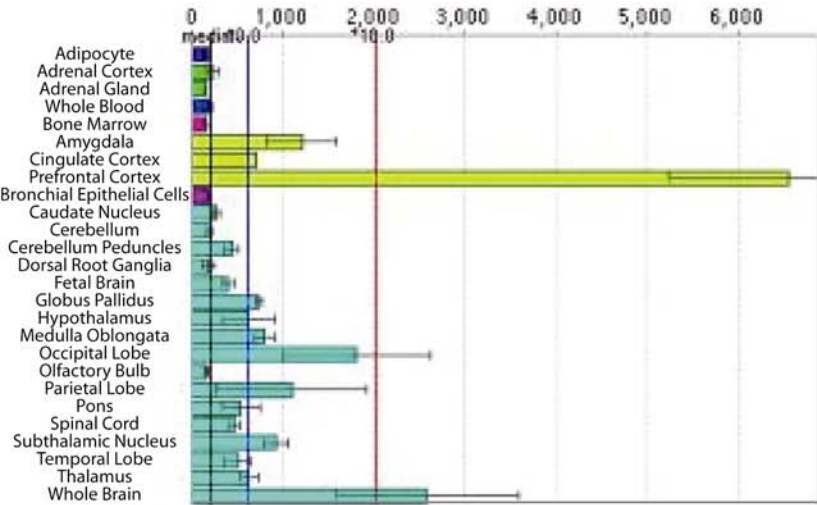

*CNTNAP2* Reporter 219300\_s\_at  
Human GeneAtlas GNF1H, gcRMA

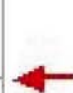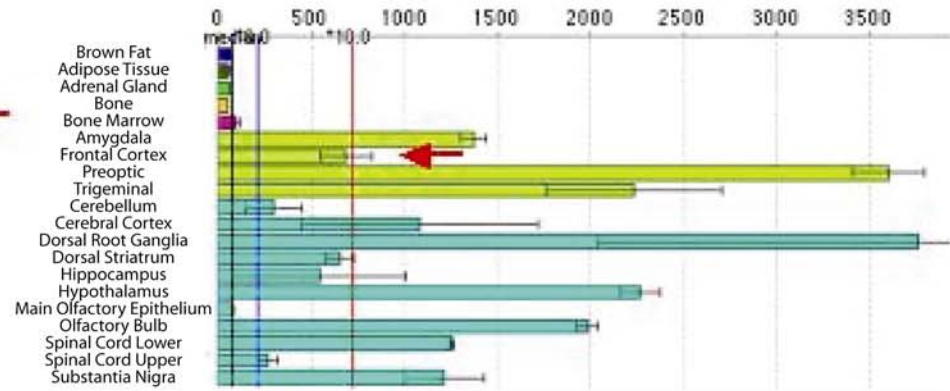

*Cntnap2* Reporter gnf1m04688\_a\_at  
Mouse GeneAtlas GNF1M, gcRMA

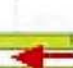

Supplement: pnas_0706128104_2.pdf [file pnas_0706128104_2.pdf]
