# Supplementary material
Source: PubMed Central journal article supplement (PMC2077018)
Supplement: pnas_0706128104_3.pdf [file pnas_0706128104_3.pdf]

**Table 1. Tissues for Agilent and Affymetrix arrays**

| ID # | Tissue | Side  | Agilent | Affymetrix | Age (gw) | Sex | PMI  | Ethnicity        |
|------|--------|-------|---------|------------|----------|-----|------|------------------|
| 183  | CTX    | Left  | Y       | No         | 19.5     | F   | n/a  | African American |
| 183  | CTX    | Right | Y       | Y          | 19.5     | F   | n/a  | African American |
| 488  | STG    | Left  | Y       | Y          | 19       | M   | 2.5  | n/a              |
| 488  | STG    | Right | Y       | Y          | 19       | M   | 2.5  | n/a              |
| 490  | STG    | Right | Y       | Y          | 19       | M   | 3    | n/a              |
| 532  | STG    | Left  | Y       | Y          | 17       | F   | 0.54 | African American |
| 532  | STG    | Right | Y       | Y          | 17       | F   | 0.48 | African American |
| 532  | CTX    | Left  | Y       | Y          | 17       | F   | n/a  | African American |
| 532  | CTX    | Right | Y       | Y          | 17       | F   | n/a  | African American |
| 867  | STG    | Left  | Y       | Y          | 22       | M   | 0.84 | Caucasian        |
| 867  | STG    | Right | Y       | Y          | 22       | M   | 0.87 | Caucasian        |
| 1007 | CTX    | Left  | Y       | No         | 18       | M   | 3    | African American |
| 1007 | CTX    | Right | Y       | Y          | 18       | M   | 3    | African American |
| 1056 | CTX    | Left  | No      | Y          | 19       | n/a | n/a  | n/a              |
| 1056 | CTX    | Right | No      | Y          | 19       | n/a | n/a  | n/a              |
| 1137 | CTX    | Left  | No      | Y          | 18       | M   | 2    | African American |
| 1137 | CTX    | Right | No      | Y          | 18       | M   | 2    | African American |
