# Supplementary material
Source: PubMed Central journal article supplement (PMC2077018)
Supplement: pnas_0706128104_4.pdf [file pnas_0706128104_4.pdf]

**Table 2. Microarray overlap (Agilent vs. Affymetrix)**

| Gene name       | NCBI Gene ID | Agilent*                      | Agilent probe IDs | Agilent*                      | Affymetrix probe IDs |
|-----------------|--------------|-------------------------------|-------------------|-------------------------------|----------------------|
|                 |              | Fold change ( <i>P</i> value) |                   | Fold change ( <i>P</i> value) |                      |
| <i>SERPINF1</i> | Hs.173594    | -1.88 (0.002)                 | A_23_P100660      | -2.64 (7.65E-06)              | 202283_at            |
| <i>TCF7L2</i>   | Hs.214039    | -5.51 (9.814E-06)             | A_23_P127014      | -9.71 (2.67E-06)              | 212759_s_at          |
| <i>COL1A2</i>   | Hs.489142    | -2.54 (0.001)                 | A_23_P255244      | -2.36 (9.7E-09)               | 202404_s_at          |
| <i>CACNA2D3</i> | Hs.435112    | -1.79 (0.002)                 | A_23_P147166      | -2.16 (1.7E-06)               | 219714_s_at          |
| <i>PCDH17</i>   | Hs.106511    | -3.83 (0.0004)                | A_23_P205057      | -2.25 (1.55E-06)              | 205656_at            |
| <i>CA10</i>     | Hs.283110    | -2.00 (0.002)                 | A_23_P207461      | -2.64 (2.84E-05)              | 220889_s_at          |
| <i>COL1A1</i>   | Hs.172928    | -3.66 (0.002)                 | A_23_P207521      | -2.53 (5.43E-07)              | 202310_s_at          |
| <i>TAC1</i>     | Hs.2563      | -2.88 (0.0002)                | A_23_P215283      | -2.35 (8.65E-08)              | 206552_s_at          |
| <i>IGFBP7</i>   | Hs.435795    | -1.59 (0.001)                 | A_23_P255111      | -2.11 (3.55E-05)              | 201162_at            |
| <i>TPD52L1</i>  | Hs.16611     | -2.09 (0.002)                 | A_23_P31143       | -2.30 (6.17E-06)              | 203786_s_at          |
| <i>NTS</i>      | Hs.80962     | -6.89 (9.81E-06)              | A_23_P36882       | -2.58 (2.2E-06)               | 206291_at            |
| <i>ADCY2</i>    | Hs.414591    | -1.70 (0.0004)                | A_23_P38434       | -2.13 (0.005)                 | 213219_at            |
| <i>CNTNAP2</i>  | Hs.106552    | -2.54 (0.003)                 | A_23_P84399       | -2.25 (0.0006)                | 219300_s_at          |

\*Fold change values are in base 10; *P* values are corrected for multiple comparisons.

For genes with multiple probes/array, that with the greatest fold change is included above.
