# Supplementary material
Source: PubMed Central journal article supplement (PMC2077018)
Supplement: pnas_0706128104_5.pdf [file pnas_0706128104_5.pdf]

**Table 3. Oligos for Q-PCR**

| <b>Gene name</b> | <b>NCBI accession no.</b> | <b>Seq interval</b> | <b>Base-pair amplicon</b> | <b>L oBSA #</b> | <b>R oBSA #</b> | <b>L sequence (5' to 3')</b> | <b>R sequence (5' to 3')</b> |
|------------------|---------------------------|---------------------|---------------------------|-----------------|-----------------|------------------------------|------------------------------|
| <i>CD19</i>      | NM 001770                 | 56-166              | 111                       | 108             | 109             | GGCCCGAGGAACCTCTAGT          | ACTCCCAGACCAGGTCAG           |
| <i>CD19</i>      | BC052294                  | 1450-1678           | 229                       | 469             | 470             | ACGAGGATGAAGAGCTGACC         | CCATCGGGAATTATCCATGTT        |
| <i>CDH7</i>      | BC036786                  | 863-1043            | 181                       | 134             | 135             | TCAACGACAATGAACCCAAA         | GGCTCCACTGAGAAAGTACGG        |
| <i>CNTNAP2</i>   | NM 014141.2               | 317-418             | 102                       | 274             | 275             | TCCCGGCTATGCCAAGATAAA        | TTCCGATTGCCAAAAGTCAACC       |
| <i>COL1A1</i>    | Z74615                    | 82-244              | 143                       | 90              | 91              | GTCGAGGGCCAAGACGAAAG         | CAGATCACGTTCATCGCACAAAC      |
| <i>COL1A2</i>    | J03464                    | 552-677             | 103                       | 102             | 103             | TCTGGATGGATTGAAAGGGACA       | CCAACACGTCCTCTCTCACC         |
| <i>COL6A3</i>    | NM 004369.1               | 9688-9870           | 183                       | 140             | 141             | TGTGGTGGAAACGAAAACAA         | CACCCGGAGCTTCTACAGAG         |
| <i>FLJ13352</i>  | AK023414.1                | 142-294             | 153                       | 58              | 59              | GACCTGATCCGGCTATGGGAAA       | CAGAGATTGAGTAAGGCACCCAAA     |
| <i>FLJ22774</i>  | NM 032229.1               | 382-532             | 151                       | 66              | 67              | ACCTCTCCAGCTGTGCATT          | GCACTGGAGTTTGGGAGTGT         |
| <i>FLJ31235</i>  | AK094223.1                | 630-788             | 159                       | 76              | 77              | AGCCGTATGCTACATGCTTCA        | GTGTTCCCACATGATCCCAGAT       |
| <i>GJA1</i>      | NM 000165                 | 49-273              | 225                       | 172             | 173             | AGGCGTGAGGAAAGTACCAG         | CCCTCCAGCAGTTGAGTAGG         |
| <i>I 1002014</i> | AK025719.1                | 61-153              | 93                        | 62              | 63              | CCCTGTGAGTGGGCCATTTC         | CGTTTTGGATCTCAGGCCAAAT       |
| <i>I 929885</i>  | AK096150.1                | 51-212              | 162                       | 70              | 71              | CTCGCCTGGGATTACGTGC          | ACACACATTATGCAAGGGTTTGT      |
| <i>I 957320</i>  | AJ420521                  | 229-418             | 190                       | 116             | 117             | AGTGCAAAGATCCCCAGCTA         | CACCAGCAGTATCCCCTGTGA        |
| <i>IGF2</i>      | X07868                    | 61-153              | 93                        | 182             | 183             | CCCTGTGAGTGGGCCATTTC         | CGTTTTGGATCTCAGGCCAAAT       |
| <i>LDB1</i>      | BC000482                  | 1082-1311           | 230                       | 479             | 480             | CGACATGATGCCGGATAAAGA        | GGCTGAGGCTGTAGGTTCTTG        |
| <i>MGC13024</i>  | NM 152288.1               | 393-583             | 191                       | 176             | 177             | CACGTCTGCCCTGCTCTC           | GGATGTGCTCACAGCTTCA          |
| <i>MGC13024</i>  | NM 152288.1               | 1378-1563           | 186                       | 463             | 464             | AGTTGTGGGACCTTCAGTG          | GCATCTTTTGAGCCCTGGAAG        |
| <i>MIZ1</i>      | NM 032908.1               | 83-308              | 226                       | 180             | 181             | TGATAGCACGCTATTCTTCCIT       | ACCTAGCATGGTGCCTCAAC         |
| <i>MID2</i>      | BX648241                  | 1397-1556           | 160                       | 146             | 147             | GAGGTGGGACTGGAAGACAA         | AAAACTTGGATTGGCAGTGG         |
| <i>NR4A2</i>     | BC009288                  | 2461-2700           | 240                       | 461             | 462             | TGCCCTTTAACAAAGACTTCAAA      | TCAACATGCTTGTCCCTTTT         |

| Gene name      | NCBI accession no. | Seq interval | Base-pair amplicon | L oBSA # | R oBSA # | L sequence (5' to 3')  | R sequence (5' to 3')   |
|----------------|--------------------|--------------|--------------------|----------|----------|------------------------|-------------------------|
| <i>NR4A2</i>   | BC009288           | 1439-1539    | 121                | 410      | 56       | AGTCTGATCAGTGCCCTCGT   | TATGCTGGGTGCATCTCCA     |
| <i>NR4A2</i>   | BC009288           | 1720-1925    | 206                | 409      | 47       | CCACTCTCTTGGGTTCCTTG   | CCCAGTGGAGGGTAAACTCA    |
| <i>P15-2</i>   | NM 018698          | 120-216      | 97                 | 84       | 85       | GGTAGTGACGCCGACACTG    | AGCTTACATGCTGATCTACAT   |
| <i>PCDH17</i>  | NM 014459.1        | 3395-3597    | 203                | 130      | 131      | AGAGCCAGCCTGAGAGACAG   | TCAGAATGACCAAGCACTCG    |
| <i>PIASXB</i>  | NM 004671.1        | 1548-1737    | 190                | 465      | 466      | TGTGACTTCGGTTGATCCTG   | GCTTGCTGTTAAGGGTGAGG    |
| <i>PTGDS</i>   | NM 000954.1        | 334-572      | 239                | 158      | 159      | AACCAGTGTGAGACCCGAAC   | AAGCGGTGAATTTCTCCTT     |
| <i>SAA4</i>    | BG564326.1         | 45-271       | 227                | 186      | 187      | CAAGGACGGTTGTTGGATTT   | TGGAGAGCCTCCTTGAAAAA    |
| <i>SAA4</i>    | BG564326           | 177-365      | 189                | 483      | 484      | CAGCACAAATGAGGCTTTTCA  | CATCATAGTTTCCCCGAGCA    |
| <i>SDR-O</i>   | AY044434.1         | 400-613      | 214                | 112      | 113      | CTGGTGGGACTGATCGAAGT   | AGTTCCCTGGCTCAATGATG    |
| <i>SNAP25A</i> | L19760             | 378-536      | 159                | 126      | 127      | CAACTCGATCGTGTCTCGAAGA | ATTATTGCCCCAGGGCTTTTT   |
| <i>TAC1</i>    | NM 003182          | 303-370      | 68                 | 96       | 97       | TTCCTTTGTTGGACTAATGGGC | TCTGCAATTGCACCTCCTTTCAT |
| <i>ZIC1</i>    | NM 003412.1        | 1826-1989    | 164                | 168      | 169      | GTCTACACGCATCCAGTT     | GCGATAAGGAGGCTTGTGGTC   |
