# Supplementary material
Source: PubMed Central journal article supplement (PMC2077018)
Supplement: pnas_0706128104_6.pdf [file pnas_0706128104_6.pdf]

**Table 4. Tissues for *in situ* hybridization**

| <b>ID #</b> | <b>Species</b> | <b>Age</b> | <b>Plane</b> | <b>Sex</b> | <b>PMI</b> | <b>Ethnicity</b> |
|-------------|----------------|------------|--------------|------------|------------|------------------|
| 1109        | Human          | 16 gw      | Coronal      | M          | n/a        | Caucasian        |
| 1137        | Human          | 18 gw      | Coronal      | F          | 2 hr       | African American |
| 427L        | Human          | 19 gw      | Sagittal     | n/a        | n/a        | n/a              |
| 1056        | Human          | 19 gw      | Coronal      | F          | 1 hr       | Caucasian        |
| 1057        | Human          | 19 gw      | Sagittal     | F          | 1 hr       | African American |
| 1110        | Human          | 19 gw      | Coronal      | F          | n/a        | African American |
| 1776        | Human          | 19 gw      | Sagittal     | F          | 1 hr       | African American |
| 1010        | Human          | 20 gw      | Sagittal     | F          | n/a        | n/a              |
| 518R        | Human          | 20 gw      | Sagittal     | F          | n/a        | n/a              |
| TBSA287     | Mouse          | e14        | Sagittal     | n/a        | < 1 hr     | n/a              |
| TBSA111     | Mouse          | e15        | Sagittal     | n/a        | < 1 hr     | n/a              |
| TBSA112     | Mouse          | e15        | Sagittal     | n/a        | < 1 hr     | n/a              |
| TBSA113     | Mouse          | e16        | Coronal      | n/a        | < 1 hr     | n/a              |
| TBSA288     | Mouse          | e17        | Sagittal     | n/a        | < 1 hr     | n/a              |
| TBSA289     | Mouse          | e17        | Coronal      | n/a        | < 1 hr     | n/a              |
| TBSA116     | Mouse          | e17        | Sagittal     | n/a        | < 1 hr     | n/a              |
| TBSA263     | Mouse          | e17        | Coronal      | n/a        | < 1 hr     | n/a              |
| TBSA265     | Mouse          | e17        | Coronal      | n/a        | < 1 hr     | n/a              |
| TBSA254     | Rat            | e21        | Sagittal     | n/a        | < 1 hr     | n/a              |

gw, gestational weeks; PMI, postmortem interval.
