# Supplementary material
Source: PubMed Central journal article supplement (PMC2077018)
Supplement: pnas_0706128104_7.pdf [file pnas_0706128104_7.pdf]

**Table 5. Probes for *in situ* hybridization**

| Gene name       | NCBI accession no. | pBSA # | Insert          | Species |
|-----------------|--------------------|--------|-----------------|---------|
| <i>CNTNAP2</i>  | NM_014141          | 2      | bps 548-4300    | Human   |
| <i>CNTNAP2</i>  | NM_014141          | 13     | bps 3550-4100   | Human   |
| <i>CNTNAP2</i>  | NM_014141.4        | 83     | bps 2318-1867   | Human   |
| <i>Cntnap2</i>  | 52138537           | 98     | bps 191-667     | Mouse   |
| <i>Cntnap2</i>  | 52138537           | 57     | bps 3600-4900   | Mouse   |
| <i>COL1A1</i>   | NM_000088          | 61     | bps 1 - 4748    | Human   |
| <i>CD19</i>     | BC006338           | 82     | bps 1826-1384   | Human   |
| <i>CG033</i>    | NP_660347.1        | 92     | bps 594-1049    | Human   |
| <i>GLIS3</i>    | NM_152629.2        | 87     | bps 2219-1734   | Human   |
| <i>HOXB13</i>   | AY937237           | 1      | bps 32-824      | Human   |
| <i>LDB1</i>     | BC028170.1         | 4      | bps 46-623      | Human   |
| <i>MAB21L1</i>  | BC028170           | 22     | bps 75-664      | Human   |
| <i>MGC13024</i> | NM_152288          | 25     | bp 802-1305     | Human   |
| <i>NR4A2</i>    | BC009288           | 3      | bps 4-2175      | Human   |
| <i>NR4A2</i>    | NM_173172          | 52     | bps 2700-3300   | Human   |
| <i>Nr4a2</i>    | NM_013613          | 55     | bps 1950-2450   | Mouse   |
| <i>P15-2</i>    | NM_018698          | 29     | bps 208-847     | Human   |
| <i>PCDH17</i>   | NM_014459.2        | 100    | bps 4025-4566   | Human   |
| <i>PCDH17</i>   | NM_014459.2        | 86     | bps 3374-3906 * | Human   |
| <i>PIASXB</i>   | AF077954.1         | 8      | bps 79-599      | Human   |
| <i>TTR</i>      | BC020791           | 14     | bps 27-616      | Human   |

\*An additional 80 bp (below), presumably representing a splice variant, were present between base pairs 3541-3542 of NM\_014459.2.

>Additional sequence within cloned cDNA insert.

tgccacagatgaatgccgagtgcttggctcattctgacaggtgctggatgccacagttcctgcagccaatcaggctgaaaatgc
