# Supplementary material
Source: PubMed Central journal article supplement (PMC2077018)
Supplement: pnas_0706128104_8.pdf [file pnas_0706128104_8.pdf]

**Table 6. In situ hybridization and Q-PCR confirm 23/32 array targets identified by microarray**

| <b>Gene name</b> | <b>NCBI accession no.</b> | <b>Confirmation status</b> |
|------------------|---------------------------|----------------------------|
| <i>CD19</i>      | BC052294                  | nc Q-PCR                   |
| <i>CDH7</i>      | BC036786                  | Q-PCR                      |
| <i>CNTNAP2*</i>  | NM 014141.2               | ISH, Q-PCR                 |
| <i>COL1A1*</i>   | Z74615                    | ISH, Q-PCR                 |
| <i>COL1A2 *</i>  | J03464                    | Q-PCR                      |
| <i>COL6A3</i>    | NM 004369.1               | Q-PCR                      |
| <i>FLJ13352</i>  | AK023414.1                | nc Q-PCR                   |
| <i>FLJ22774</i>  | NM 032229.1               | Q-PCR                      |
| <i>FLJ31235</i>  | AK094223.1                | nc Q-PCR                   |
| <i>GJA1</i>      | NM 000165                 | nc Q-PCR                   |
| <i>GLIS3</i>     | NM 152629.2               | nc ISH                     |
| <i>HOXB13</i>    | AY937237                  | ISH                        |
| <i>I 1002014</i> | AK025719.1                | Q-PCR                      |
| <i>I 929885</i>  | AK096150.1                | nc Q-PCR                   |
| <i>I 957320</i>  | AJ420521                  | Q-PCR                      |
| <i>IGF2</i>      | X07868                    | Q-PCR                      |
| <i>LDB1</i>      | BC000482                  | ISH, nc Q-PCR              |
| <i>MAB21L1</i>   | BC028170                  | ISH                        |
| <i>MGC13024</i>  | NM 152288.1               | ISH, nc Q-PCR              |
| <i>MIZ1</i>      | NM 032908.1               | nc Q-PCR                   |
| <i>NID2</i>      | BX648241                  | Q-PCR                      |
| <i>NR4A2</i>     | BC009288                  | ISH, nc Q-PCR              |
| <i>P15-2</i>     | NM 018698                 | ISH, Q-PCR                 |
| <i>PCDH17*</i>   | NM 014459.1               | ISH, Q-PCR                 |

| <b>Gene name</b> | <b>NCBI accession no.</b> | <b>Confirmation status</b> |
|------------------|---------------------------|----------------------------|
| <i>PIASXB</i>    | NM 004671.1               | ISH, nc Q-PCR              |
| <i>PTGDS</i>     | NM 000954.1               | Q-PCR                      |
| <i>SAA4</i>      | BG564326                  | nc Q-PCR                   |
| <i>SDR-O</i>     | AY044434.1                | nc Q-PCR                   |
| <i>SNAP25A</i>   | L19760                    | Q-PCR                      |
| <i>TAC1*</i>     | NM 003182                 | Q-PCR                      |
| <i>TTR</i>       | BC020791                  | ISH                        |
| <i>ZIC1</i>      | NM 003412.1               | Q-PCR                      |

Fold change  $\geq 1.5$  consistent with microarray required for Q-PCR confirmation. *In situ* confirmation based on qualitative inspection. Two-platform genes are indicated (\*). nc = not confirmed.
