# Supplementary material
Source: PubMed Central journal article supplement (PMC2077018)

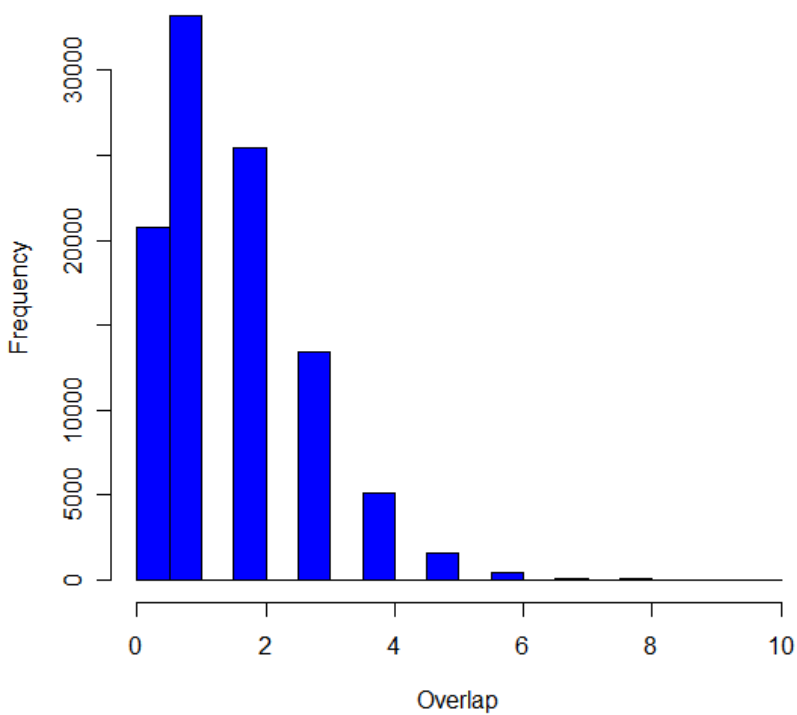

Supplement: pnas_0706128104_1.pdf [file pnas_0706128104_1.pdf]
